# Supplementary material
Source: ML conference proceedings conference paper supplement (https://proceedings.mlr.press/v51/le16.html)
Supplement: Supplementary file 1 [file le16-supp.pdf]

# Supplementary Material for Nonparametric Budgeted Stochastic Gradient Descent

## 1 Notion

We introduce some notions used in this supplementary material.

For regression task, we define  $y_{\max} = \max_y |y|$ . We further denote the set  $S$  as

$$S = \begin{cases} \mathcal{B}(\mathbf{0}, y_{\max}\lambda^{-1/2}) & \text{if L2 is used and } \lambda \leq 1 \\ \mathbb{R}^D & \text{otherwise} \end{cases}$$

where  $\mathcal{B}(\mathbf{0}, y_{\max}\lambda^{-1/2}) = \{\mathbf{w} \in \mathbb{R}^D : \|\mathbf{w}\| \leq y_{\max}\lambda^{-1/2}\}$  and  $\mathbb{R}^D$  specifies the whole feature space.

## 2 Loss Functions

We introduce five types of loss functions that can be used in our proposed algorithm, namely Hinge, Logistic, L2, L1, and  $\varepsilon$ -insensitive losses. We verify that these loss functions satisfying the necessary condition, that is,  $\|l'(\mathbf{w}; x, y)\| \leq A\|\mathbf{w}\|^{1/2} + B$  for some appropriate positive numbers  $A, B$ . Without loss of generality, we assume that feature domain are bounded, i.e.,  $\|\Phi(x)\| \leq 1, \forall x \in \mathcal{X}$ .

- **Hinge loss**

$$\begin{aligned} l(\mathbf{w}; x, y) &= \max\{0, 1 - y\mathbf{w}^\top\Phi(x)\} \\ l'(\mathbf{w}; x, y) &= -\mathbb{I}_{\{y\mathbf{w}^\top\Phi(x) \leq 1\}} y\Phi(x) \end{aligned}$$

Therefore, by choosing  $A = 0, B = 1$  we have

$$\|l'(\mathbf{w}; x, y)\| = \|\Phi(x)\| \leq 1 = A\|\mathbf{w}\|^{1/2} + B$$

- **L2 loss**

In this case, at the outset we cannot verify that  $\|l'(\mathbf{w}; x, y)\| \leq A\|\mathbf{w}\|^{1/2} + B$  for all  $\mathbf{w}, x, y$ . However, to support the proposed theory, we only need to check that  $\|l'(\mathbf{w}_t; x, y)\| \leq A\|\mathbf{w}_t\|^{1/2} + B$  for all  $t \geq 1$ . We derive as follows

$$\begin{aligned} l(\mathbf{w}; x, y) &= \frac{1}{2}(y - \mathbf{w}^\top\Phi(x))^2 \\ l'(\mathbf{w}; x, y) &= (\mathbf{w}^\top\Phi(x) - y)\Phi(x) \end{aligned}$$

$$\begin{aligned} \|l'(\mathbf{w}_t; x, y)\| &= |\mathbf{w}_t^\top\Phi(x) + y|\|\Phi(x)\| \leq |\mathbf{w}_t^\top\Phi(x)| + y_{\max} \\ &\leq \|\Phi(x)\|\|\mathbf{w}_t\| + y_{\max} \leq A\|\mathbf{w}_t\|^{1/2} + B \end{aligned}$$

$$\text{where } B = y_{\max} \text{ and } A = \begin{cases} y_{\max}^{1/2}\lambda^{-1/4} & \text{if } \lambda \leq 1 \\ y_{\max}^{1/2}(\lambda - 1)^{-1/2} & \text{otherwise} \end{cases}.$$

Here we note that we make use of the fact that  $\|\mathbf{w}_t\| \leq y_{\max}(\lambda - 1)^{-1}$  if  $\lambda > 1$  (cf. Thm. 7) and  $\|\mathbf{w}_t\| \leq y_{\max}\lambda^{-1/2}$  otherwise (cf. Line 13 in Alg. 2 and Line 16 in Alg. 3).

- **L1 loss**

$$l(\mathbf{w}; x, y) = |y - \mathbf{w}^\top \Phi(x)|$$

$$l'(\mathbf{w}; x, y) = \text{sign}(\mathbf{w}^\top \Phi(x) - y) \Phi(x)$$

Therefore, by choosing  $A = 0$ ,  $B = 1$  we have

$$\left\| l'(\mathbf{w}; x, y) \right\| = \|\Phi(x)\| \leq 1 = A \|\mathbf{w}\|^{1/2} + B$$

- **Logistic loss**

$$l(\mathbf{w}; x, y) = \log(1 + \exp(-y\mathbf{w}^\top \Phi(x)))$$

$$l'(\mathbf{w}; x, y) = \frac{-y \exp(-y\mathbf{w}^\top \Phi(x)) \Phi(x)}{\exp(-y\mathbf{w}^\top \Phi(x)) + 1}$$

Therefore, by choosing  $A = 0$ ,  $B = 1$  we have

$$\left\| l'(\mathbf{w}; x, y) \right\| < \|\Phi(x)\| \leq 1 = A \|\mathbf{w}\|^{1/2} + B$$

- **$\varepsilon$ -insensitive loss**

$$l(\mathbf{w}; x, y) = \max\{0, |y - \mathbf{w}^\top \Phi(x)| - \varepsilon\}$$

$$l'(\mathbf{w}; x, y) = \mathbb{I}_{\{|y - \mathbf{w}^\top \Phi(x)| > \varepsilon\}} \text{sign}(\mathbf{w}^\top \Phi(x) - y) \Phi(x)$$

Therefore, by choosing  $A = 0$ ,  $B = 1$  we have

$$\left\| l'(\mathbf{w}; x, y) \right\| = \|\Phi(x)\| \leq 1 = A \|\mathbf{w}\|^{1/2} + B$$

### 3 Proofs

In this section, we present the full proofs of the corollaries and theorems in our paper.

**Corollary 1.** *The following holds for all  $t$ ,*

$$\mathbb{E} \left[ \|\mathbf{w}_t\|^2 \right] < P^2 = \left( \frac{A + \sqrt{A^2 + B\lambda}}{\lambda} \right)^2$$

*Proof.* We prove by induction in  $t$  that  $\mathbb{E} \left[ \|\mathbf{w}_t\|^2 \right]^{1/2} < P = \frac{A + \sqrt{A^2 + B\lambda}}{\lambda}$ ,  $\forall t = 1, 2, \dots$

It is obvious for  $t = 1$  from  $\mathbb{E} \left[ \|\mathbf{w}_1\|^2 \right]^{1/2} = 0$ .

Assume that the statement holds for  $t$ , according to Minkowski inequality we then have

$$\begin{aligned} \sqrt{\mathbb{E} \left[ \|\mathbf{w}_{t+1}\|^2 \right]} &\leq \frac{t-1}{t} \sqrt{\mathbb{E} \left[ \|\mathbf{w}_t\|^2 \right]} + \frac{1}{\lambda t} \sqrt{\mathbb{E} \left[ \|l'(\mathbf{w}_t; x_t, y_t)\|^2 \right]} + \frac{1}{\lambda t} \sqrt{\mathbb{E} \left[ Z_t^2 \|l'(\mathbf{w}_{t'}; x_{t'}, y_{t'})\|^2 \right]} \\ &\leq \frac{t-1}{t} \sqrt{\mathbb{E} \left[ \|\mathbf{w}_t\|^2 \right]} + \frac{1}{\lambda t} \sqrt{\mathbb{E} \left[ \|l'(\mathbf{w}_t; x_t, y_t)\|^2 \right]} + \frac{1}{\lambda t} \sqrt{\mathbb{E} \left[ \|l'(\mathbf{w}_{t'}; x_{t'}, y_{t'})\|^2 \right]} \\ &\leq \frac{t-1}{t} \sqrt{\mathbb{E} \left[ \|\mathbf{w}_t\|^2 \right]} + \frac{1}{\lambda t} \left( A \sqrt{\mathbb{E} \left[ \|\mathbf{w}_t\| \right]} + B + A \sqrt{\mathbb{E} \left[ \|\mathbf{w}_{t'}\| \right]} + B \right) \\ &\leq \frac{t-1}{t} P + \frac{2}{\lambda t} \left( A \sqrt{P} + B \right) = P \end{aligned}$$

Note that we have used the assumption about loss function  $\left\| l'(\mathbf{w}; x, y) \right\| \leq A \|\mathbf{w}\|^{1/2} + B$  for all  $\mathbf{w}, x, y$ .  $\square$

**Corollary 2.** *The following holds for all  $t$ ,*

$$\mathbb{E} \left[ \left\| l'(\mathbf{w}_t; x_t, y_t) \right\|^2 \right] \leq L = \left( A \sqrt{P} + B \right)^2$$

*Proof.* We have the following

$$\sqrt{\mathbb{E} \left[ \|l'(\mathbf{w}_t; x_t, y_t)\|^2 \right]} \leq \sqrt{\mathbb{E} \left[ \left( A \|\mathbf{w}_t\|^{1/2} + B \right)^2 \right]} \leq A\sqrt{\mathbb{E} [\|\mathbf{w}_t\|]} + B \leq A\sqrt{P} + B$$

□

**Corollary 3.** *The following holds for all  $t$ ,*

$$\mathbb{E} \left[ \|g_t\|^2 \right] \leq G = \left( \lambda P + A\sqrt{P} + B \right)^2$$

*Proof.* Again using Minkowski inequality

$$\sqrt{\mathbb{E} \left[ \|g_t\|^2 \right]} \leq \lambda\sqrt{\mathbb{E} \left[ \|\mathbf{w}_t\|^2 \right]} + \sqrt{\mathbb{E} \left[ \|l'(\mathbf{w}_t; x_t, y_t)\|^2 \right]} \leq \lambda P + A\sqrt{P} + B$$

□

**Corollary 4.** *The following holds for all  $t$ ,*

$$\mathbb{E} \left[ \|\mathbf{w}_t - \mathbf{w}^*\|^2 \right] \leq W = \frac{\lambda L^{1/2} + \sqrt{\lambda^2 L + 8\lambda^2 Q}}{4\lambda^2}$$

*Proof.* Let us define  $\delta_t = g_t - Z_t l'(\mathbf{w}_t; x_t, y_t)$ . We have the following

$$\mathbf{w}_{t+1} = \mathbf{w}_t - \eta_t \delta_t$$

$$\begin{aligned} \|\mathbf{w}_{t+1} - \mathbf{w}^*\|^2 &= \|\mathbf{w}_t - \eta_t \delta_t - \mathbf{w}^*\|^2 = \|\mathbf{w}_t - \mathbf{w}^*\|^2 + \eta_t^2 \|\delta_t\|^2 - 2\eta_t \langle \mathbf{w}_t - \mathbf{w}^*, \delta_t \rangle \\ &= \|\mathbf{w}_t - \mathbf{w}^*\|^2 + \eta_t^2 \|\delta_t\|^2 - 2\eta_t \langle \mathbf{w}_t - \mathbf{w}^*, g_t \rangle + 2\eta_t \left\langle \mathbf{w}_t - \mathbf{w}^*, Z_t l'(\mathbf{w}_t; x_t, y_t) \right\rangle \end{aligned}$$

Taking conditional expectation w.r.t  $\mathbf{w}_t^1$ , we gain

$$\begin{aligned} \mathbb{E} \left[ \|\mathbf{w}_{t+1} - \mathbf{w}^*\|^2 \right] &= \mathbb{E} \left[ \|\mathbf{w}_t - \mathbf{w}^*\|^2 \right] + \eta_t^2 \mathbb{E} \left[ \|\delta_t\|^2 \right] - 2\eta_t \langle \mathbf{w}_t - \mathbf{w}^*, \mathbb{E} [g_t] \rangle + 2\eta_t \left\langle \mathbf{w}_t - \mathbf{w}^*, \mathbb{E} \left[ Z_t l'(\mathbf{w}_t; x_t, y_t) \right] \right\rangle \\ &= \mathbb{E} \left[ \|\mathbf{w}_t - \mathbf{w}^*\|^2 \right] + \eta_t^2 \mathbb{E} \left[ \|\delta_t\|^2 \right] - 2\eta_t \left\langle \mathbf{w}_t - \mathbf{w}^*, f'(\mathbf{w}_t) \right\rangle + 2\eta_t \left\langle \mathbf{w}_t - \mathbf{w}^*, \mathbb{E} \left[ Z_t l'(\mathbf{w}_t; x_t, y_t) \right] \right\rangle \\ &\leq \mathbb{E} \left[ \|\mathbf{w}_t - \mathbf{w}^*\|^2 \right] + \eta_t^2 \mathbb{E} \left[ \|\delta_t\|^2 \right] + 2\eta_t \left\langle \mathbf{w}_t - \mathbf{w}^*, \mathbb{E} \left[ Z_t l'(\mathbf{w}_t; x_t, y_t) \right] \right\rangle \\ &\quad + 2\eta_t \left( f(\mathbf{w}^*) - f(\mathbf{w}_t) - \frac{\lambda}{2} \|\mathbf{w}_t - \mathbf{w}^*\|^2 \right) \end{aligned}$$

Since the function  $f(\cdot)$  is  $\lambda$ -strongly convex and  $\mathbf{w}^*$  is the optimal solution, we have

$$f(\mathbf{w}_t) - f(\mathbf{w}^*) \geq \left\langle f'(\mathbf{w}_t), \mathbf{w}_t - \mathbf{w}^* \right\rangle + \frac{\lambda}{2} \|\mathbf{w}_t - \mathbf{w}^*\|^2 \geq \frac{\lambda}{2} \|\mathbf{w}_t - \mathbf{w}^*\|^2$$

It follows that

$$\mathbb{E} \left[ \|\mathbf{w}_{t+1} - \mathbf{w}^*\|^2 \right] \leq \mathbb{E} \left[ \|\mathbf{w}_t - \mathbf{w}^*\|^2 \right] + \eta_t^2 \mathbb{E} \left[ \|\delta_t\|^2 \right] + 2\eta_t \left\langle \mathbf{w}_t - \mathbf{w}^*, \mathbb{E} \left[ Z_t l'(\mathbf{w}_t; x_t, y_t) \right] \right\rangle - 2\eta_t \lambda \|\mathbf{w}_t - \mathbf{w}^*\|^2$$

Taking expectation the above inequality, we achieve

$$\begin{aligned}
\mathbb{E} \left[ \|\mathbf{w}_{t+1} - \mathbf{w}^*\|^2 \right] &\leq \mathbb{E} \left[ \|\mathbf{w}_t - \mathbf{w}^*\|^2 \right] + \eta_t^2 \mathbb{E} \left[ \|\delta_t\|^2 \right] + 2\eta_t \mathbb{E} \left[ \left\langle \mathbf{w}_t - \mathbf{w}^*, Z_t l'(\mathbf{w}_{t'}; x_{t'}, y_{t'}) \right\rangle \right] - 2\eta_t \lambda \mathbb{E} \|\mathbf{w}_t - \mathbf{w}^*\|^2 \\
&= \frac{t-2}{t} \mathbb{E} \left[ \|\mathbf{w}_t - \mathbf{w}^*\|^2 \right] + \eta_t^2 \mathbb{E} \left[ \|\delta_t\|^2 \right] + 2\eta_t \mathbb{E} \left[ \left\langle \mathbf{w}_t - \mathbf{w}^*, Z_t l'(\mathbf{w}_{t'}; x_{t'}, y_{t'}) \right\rangle \right] \\
&\leq \frac{t-2}{t} \mathbb{E} \left[ \|\mathbf{w}_t - \mathbf{w}^*\|^2 \right] + \eta_t^2 \mathbb{E} \left[ \|\delta_t\|^2 \right] + 2\eta_t \mathbb{E} \left[ \|\mathbf{w}_t - \mathbf{w}^*\|^2 \right]^{1/2} \mathbb{E} \left[ \left\| l'(\mathbf{w}_{t'}; x_{t'}, y_{t'}) \right\|^2 \right]^{1/2} \mathbb{E} \left[ Z_t^2 \right]^{1/2} \\
&\leq \frac{t-2}{t} \mathbb{E} \left[ \|\mathbf{w}_t - \mathbf{w}^*\|^2 \right] + \eta_t^2 \mathbb{E} \left[ \|\delta_t\|^2 \right] + 2\eta_t \mathbb{E} \left[ \|\mathbf{w}_t - \mathbf{w}^*\|^2 \right]^{1/2} \mathbb{E} \left[ \left\| l'(\mathbf{w}_{t'}; x_{t'}, y_{t'}) \right\|^2 \right]^{1/2} \mathbb{P}(Z_t = 1)^{1/2} \\
&\leq \frac{t-2}{t} \mathbb{E} \left[ \|\mathbf{w}_t - \mathbf{w}^*\|^2 \right] + \frac{Q}{\lambda^2 t^2} + \frac{\mathbb{E} \left[ \|\mathbf{w}_t - \mathbf{w}^*\|^2 \right]^{1/2} L^{1/2}}{\lambda t} \\
&\leq \frac{t-2}{t} \mathbb{E} \left[ \|\mathbf{w}_t - \mathbf{w}^*\|^2 \right] + \frac{Q}{\lambda^2} + \frac{\mathbb{E} \left[ \|\mathbf{w}_t - \mathbf{w}^*\|^2 \right]^{1/2} L^{1/2}}{\lambda t}
\end{aligned}$$

Choosing  $W = \frac{\lambda L^{1/2} + \sqrt{\lambda^2 L + 8\lambda^2 Q}}{4\lambda^2}$ , we destine if  $\mathbb{E} \left[ \|\mathbf{w}_t - \mathbf{w}^*\|^2 \right] \leq W$  then  $\mathbb{E} \left[ \|\mathbf{w}_{t+1} - \mathbf{w}^*\|^2 \right] \leq W$ .

Here we note that we have bounded  $\mathbb{E} \left[ \|\delta_t\|^2 \right] \leq 2 \left( \mathbb{E} \left[ \|g_t\|^2 \right] + \mathbb{E} \left[ \left\| l'(\mathbf{w}_{t'}; x_{t'}, y_{t'}) \right\|^2 \right] \right) = 2(G + L) = Q$  and  $\mathbb{E} \left[ Z_t^2 \right] = P(Z_t = 1) = p_t \leq 1$ .  $\square$

**Theorem 5.** If  $\mathbf{w}^* = \underset{\mathbf{w}}{\operatorname{argmin}} \left( \frac{\lambda}{2} \|\mathbf{w}\|^2 + \frac{1}{N} \sum_{i=1}^N (y_i - \mathbf{w}^\top \Phi(x_i))^2 \right)$  then  $\|\mathbf{w}^*\| \leq y_{\max} \lambda^{-1/2}$ .

*Proof.* Let us consider the equivalent constrains optimization problem

$$\begin{aligned}
&\min_{\mathbf{w}, \boldsymbol{\xi}} \left( \frac{\lambda}{2} \|\mathbf{w}\|^2 + \frac{1}{N} \sum_{i=1}^N \xi_i^2 \right) \\
&\text{s.t.: } \xi_i = y_i - \mathbf{w}^\top \Phi(x_i), \forall i
\end{aligned}$$

The Lagrange function is of the following form

$$\mathcal{L}(\mathbf{w}, \boldsymbol{\xi}, \boldsymbol{\alpha}) = \frac{\lambda}{2} \|\mathbf{w}\|^2 + \frac{1}{N} \sum_{i=1}^N \xi_i^2 + \sum_{i=1}^N \alpha_i (y_i - \mathbf{w}^\top \Phi(x_i) - \xi_i)$$

Setting the derivatives to 0, we gain

$$\nabla_{\mathbf{w}} \mathcal{L} = \lambda \mathbf{w} - \sum_{i=1}^N \alpha_i \Phi(x_i) = 0 \rightarrow \mathbf{w} = \lambda^{-1} \sum_{i=1}^N \alpha_i \Phi(x_i)$$

$$\nabla_{\xi_i} \mathcal{L} = \frac{2}{N} \xi_i - \alpha_i = 0 \rightarrow \xi_i = \frac{N \alpha_i}{2}$$

Substituting the above to the Lagrange function, we gain the dual form

$$\begin{aligned}
\mathcal{W}(\boldsymbol{\alpha}) &= -\frac{\lambda}{2} \|\mathbf{w}\|^2 + \sum_{i=1}^N y_i \alpha_i - \frac{N}{4} \sum_{i=1}^N \alpha_i^2 \\
&= -\frac{1}{2\lambda} \left\| \sum_{i=1}^N \alpha_i \Phi(x_i) \right\|^2 + \sum_{i=1}^N y_i \alpha_i - \frac{N}{4} \sum_{i=1}^N \alpha_i^2
\end{aligned}$$

Let us denote  $(\mathbf{w}^*, \boldsymbol{\xi}^*)$  and  $\boldsymbol{\alpha}^*$  be the primal and dual solutions, respectively. Since the strong duality holds, we have

$$\frac{\lambda}{2} \|\mathbf{w}^*\|^2 + \frac{1}{N} \sum_{i=1}^N \xi_i^{*2} = -\frac{\lambda}{2} \|\mathbf{w}^*\|^2 + \sum_{i=1}^N y_i \alpha_i^* - \frac{N}{4} \sum_{i=1}^N \alpha_i^{*2}$$

$$\begin{aligned}\lambda \|\mathbf{w}^*\|^2 &= \sum_{i=1}^N y_i \alpha_i^* - \frac{N}{4} \sum_{i=1}^N \alpha_i^{*2} - \frac{1}{N} \sum_{i=1}^N \xi_i^{*2} \\ &\leq \sum_{i=1}^N \left( y_i \alpha_i^* - \frac{N}{4} \alpha_i^{*2} \right) \leq \sum_{i=1}^N \frac{y_i^2}{N} \leq y_{\max}^2\end{aligned}$$

We note that we have used  $g(\alpha_i^*) = y_i \alpha_i^* - \frac{N}{4} \alpha_i^{*2} \leq g\left(\frac{2y_i}{N}\right) = \frac{y_i^2}{N}$ . Hence, we gain the conclusion.  $\square$

**Lemma 6.** *Assume that L2 loss is using, the following statement holds*

$$\|\mathbf{w}_{T+1}\| \leq \lambda^{-1} \left( y_{\max} + \frac{1}{T} \sum_{t=1}^T \|\mathbf{w}_t\| \right)$$

where  $y_{\max} = \max_{y \in \mathcal{Y}} |y|$ .

*Proof.* We have the following

$$\mathbf{w}_{t+1} = \prod_S \left( \frac{t-1}{t} \mathbf{w}_t - \eta_t \alpha_t \Phi(x_t) \right)$$

It follows that

$$\|\mathbf{w}_{t+1}\| \leq \frac{t-1}{t} \|\mathbf{w}_t\| + \frac{1}{\lambda t} |\alpha_t| \quad \text{since } \|\Phi(x_t)\| = 1$$

It happens that  $l'(\mathbf{w}_t; x_t, y_t) = \alpha_t \Phi(x_t)$ . Hence, we gain

$$|\alpha_t| = |y_t - \mathbf{w}_t^\top \Phi(x_t)| \leq y_{\max} + \|\mathbf{w}_t\| \|\Phi(x_t)\| \leq y_{\max} + \|\mathbf{w}_t\|$$

It implies that

$$t \|\mathbf{w}_{t+1}\| \leq (t-1) \|\mathbf{w}_t\| + \lambda^{-1} (y_{\max} + \|\mathbf{w}_t\|)$$

Taking sum when  $t = 1, 2, \dots, T$ , we achieve

$$\begin{aligned}T \|\mathbf{w}_{T+1}\| &\leq \lambda^{-1} \left( T y_{\max} + \sum_{t=1}^T \|\mathbf{w}_t\| \right) \\ \|\mathbf{w}_{T+1}\| &\leq \lambda^{-1} \left( y_{\max} + \frac{1}{T} \sum_{t=1}^T \|\mathbf{w}_t\| \right)\end{aligned}\tag{1}$$

$\square$

**Theorem 7.** *If  $\lambda > 1$  then  $\|\mathbf{w}_{T+1}\| \leq \frac{y_{\max}}{\lambda-1} \left(1 - \frac{1}{\lambda^T}\right) < \frac{y_{\max}}{\lambda-1}$  for all  $T$ .*

*Proof.* First we consider the sequence  $\{s_T\}_T$  which is identified as  $s_{T+1} = \lambda^{-1} (y_{\max} + s_T)$  and  $s_1 = 0$ . It is easy to find the formula of this sequence as

$$s_{T+1} - \frac{y_{\max}}{\lambda-1} = \lambda^{-1} \left( s_T - \frac{y_{\max}}{\lambda-1} \right) = \dots = \lambda^{-T} \left( s_1 - \frac{y_{\max}}{\lambda-1} \right) = \frac{\lambda^{-T} y_{\max}}{\lambda-1}$$

$$s_{T+1} = \frac{y_{\max}}{\lambda-1} \left( 1 - \frac{1}{\lambda^T} \right)$$

We prove by induction by  $T$  that  $\|\mathbf{w}_T\| \leq s_T$  for all  $T$ . It is obvious that  $\|\mathbf{w}_1\| = s_1 = 0$ . Assume that  $\|\mathbf{w}_t\| \leq s_t$  for  $t \leq T$ , we verify it for  $T+1$ . Indeed, we have

$$\begin{aligned}\|\mathbf{w}_{T+1}\| &\leq \lambda^{-1} \left( y_{\max} + \frac{1}{T} \sum_{t=1}^T \|\mathbf{w}_t\| \right) \leq \lambda^{-1} \left( y_{\max} + \frac{1}{T} \sum_{t=1}^T s_t \right) \\ &\leq \lambda^{-1} (y_{\max} + s_T) = s_{T+1}\end{aligned}$$

$\square$

**Theorem 8.** Let us consider running of Algorithm 2 where  $(x_t, y_t)$  is sampled from the training set  $\mathcal{D}$  or the joint distribution  $\mathbb{P}_{X, Y}$ . Let define the gradient error as  $M_t = \frac{\Delta_t}{\eta_t} = -l'(\mathbf{w}_{t'}; x_{t'}, y_{t'})$ . We have the following

$$\begin{aligned} \mathbb{E}[f(\bar{\mathbf{w}}_T) - f(\mathbf{w}^*)] &\leq \frac{Q(\log T + 1)}{2\lambda T} + \frac{1}{T} W^{1/2} \sum_{t=1}^T \mathbb{E}[\|M_t\|^2]^{1/2} \mathbb{P}(Z_t = 1)^{1/2} \\ &\leq \frac{Q(\log T + 1)}{2\lambda T} + \frac{1}{T} W^{1/2} \sum_{t=1}^T \mathbb{E}[\|M_t\|^2]^{1/2} \end{aligned}$$

*Proof.* Let us define  $\delta_t = g_t + Z_t M_t$ . We have  $\mathbf{w}_{t+1} = \mathbf{w}_t - \eta_t \delta_t$ .

$$\|\mathbf{w}_{t+1} - \mathbf{w}^*\|^2 = \|\mathbf{w}_t - \eta_t \delta_t - \mathbf{w}^*\|^2 = \|\mathbf{w}_t - \mathbf{w}^*\|^2 + \eta_t^2 \|\delta_t\|^2 - 2\eta_t \langle \mathbf{w}_t - \mathbf{w}^*, \delta_t \rangle$$

$$\langle \mathbf{w}_t - \mathbf{w}^*, g_t \rangle = \frac{\|\mathbf{w}_t - \mathbf{w}^*\|^2 - \|\mathbf{w}_{t+1} - \mathbf{w}^*\|^2}{2\eta_t} + \frac{\eta_t \|\delta_t\|^2}{2} - \langle \mathbf{w}_t - \mathbf{w}^*, Z_t M_t \rangle$$

Taking the conditional expectation w.r.t  $\mathbf{w}_t$ , we achieve

$$\begin{aligned} \langle \mathbf{w}_t - \mathbf{w}^*, \mathbb{E}[g_t] \rangle &= \frac{\mathbb{E}[\|\mathbf{w}_t - \mathbf{w}^*\|^2] - \mathbb{E}[\|\mathbf{w}_{t+1} - \mathbf{w}^*\|^2]}{2\eta_t} + \frac{\eta_t \mathbb{E}[\|\delta_t\|^2]}{2} - \langle \mathbf{w}_t - \mathbf{w}^*, \mathbb{E}[Z_t M_t] \rangle \\ \langle \mathbf{w}_t - \mathbf{w}^*, f'(\mathbf{w}_t) \rangle &= \frac{\mathbb{E}[\|\mathbf{w}_t - \mathbf{w}^*\|^2] - \mathbb{E}[\|\mathbf{w}_{t+1} - \mathbf{w}^*\|^2]}{2\eta_t} + \frac{\eta_t \mathbb{E}[\|\delta_t\|^2]}{2} - \langle \mathbf{w}_t - \mathbf{w}^*, \mathbb{E}[Z_t M_t] \rangle \end{aligned}$$

$$\begin{aligned} f(\mathbf{w}_t) - f(\mathbf{w}^*) + \frac{\lambda}{2} \|\mathbf{w}_t - \mathbf{w}^*\|^2 &\leq \frac{\mathbb{E}[\|\mathbf{w}_t - \mathbf{w}^*\|^2] - \mathbb{E}[\|\mathbf{w}_{t+1} - \mathbf{w}^*\|^2]}{2\eta_t} \\ &\quad + \frac{\eta_t \mathbb{E}[\|\delta_t\|^2]}{2} - \langle \mathbf{w}_t - \mathbf{w}^*, \mathbb{E}[Z_t M_t] \rangle \end{aligned}$$

Taking expectation, we come to the following

$$\begin{aligned} \mathbb{E}[f(\mathbf{w}_t) - f(\mathbf{w}^*)] &\leq \frac{\lambda}{2} (t-1) \mathbb{E}[\|\mathbf{w}_t - \mathbf{w}^*\|^2] - \frac{\lambda}{2} t \mathbb{E}[\|\mathbf{w}_{t+1} - \mathbf{w}^*\|^2] + \frac{Q}{2\lambda t} \\ &\quad + \mathbb{E}[\|\mathbf{w}_t - \mathbf{w}^*\|^2]^{1/2} \mathbb{E}[\|M_t\|^2]^{1/2} \mathbb{E}[Z_t^2]^{1/2} \end{aligned}$$

Summing when  $t = 1, 2, \dots, T$ , we gain

$$\begin{aligned} \mathbb{E}\left[\frac{\sum_{t=1}^T f(\mathbf{w}_t)}{T} - f(\mathbf{w}^*)\right] &\leq \frac{Q}{2\lambda T} \sum_{t=1}^T \frac{1}{t} + \frac{1}{T} \sum_{t=1}^T \mathbb{E}[\|\mathbf{w}_t - \mathbf{w}^*\|^2]^{1/2} \mathbb{E}[\|M_t\|^2]^{1/2} \mathbb{E}[Z_t^2]^{1/2} \\ &\leq \frac{Q(\log T + 1)}{2\lambda T} + \frac{1}{T} W^{1/2} \sum_{t=1}^T \mathbb{E}[\|M_t\|^2]^{1/2} \mathbb{P}(Z_t = 1)^{1/2} \\ &\leq \frac{Q(\log T + 1)}{2\lambda T} + \frac{1}{T} W^{1/2} \sum_{t=1}^T \mathbb{E}[\|M_t\|^2]^{1/2} \end{aligned} \tag{2}$$

Let  $\bar{\mathbf{w}}_T = \frac{1}{T} \sum_{t=1}^T \mathbf{w}_t$ , we reach

$$\begin{aligned} \mathbb{E}[f(\bar{\mathbf{w}}_T) - f(\mathbf{w}^*)] &\leq \frac{Q(\log T + 1)}{2\lambda T} + \frac{1}{T} W^{1/2} \sum_{t=1}^T \mathbb{E}[\|M_t\|^2]^{1/2} \mathbb{P}(Z_t = 1)^{1/2} \\ &\leq \frac{Q(\log T + 1)}{2\lambda T} + \frac{1}{T} W^{1/2} \sum_{t=1}^T \mathbb{E}[\|M_t\|^2]^{1/2} \end{aligned}$$

□

**Theorem 9.** *We denote the gap*

$$d_T = \frac{1}{T} W^{1/2} \sum_{t=1}^T \mathbb{E} \left[ \|M_t\|^2 \right]^{1/2} \mathbb{P}(Z_t = 1)^{1/2}$$

Let  $r$  be an integer picked uniformly at random from  $\{1, 2, \dots, T\}$ . Then, with probability of at least  $1 - \delta$  we have

$$f(\mathbf{w}_r) \leq f(\mathbf{w}^*) + d_T + \frac{Q(\log T + 1)}{2\lambda T \delta}$$

*Proof.* Let us denote  $X = f(\mathbf{w}_r) - f(\mathbf{w}^*) \geq 0$  and  $Y = \frac{\sum_{t=1}^T f(\mathbf{w}_t)}{T} - f(\mathbf{w}^*)$ . Then, we have

$$\mathbb{E}_r[X] = \mathbb{E}_r[f(\mathbf{w}_r) - f(\mathbf{w}^*)] = \frac{\sum_{t=1}^T f(\mathbf{w}_t)}{T} - f(\mathbf{w}^*) = Y$$

Therefore, we gain

$$\mathbb{E}[X] = \mathbb{E}_{(x_t, y_t)_1^T} [\mathbb{E}_r[X]] = \mathbb{E}[Y] \leq \frac{Q(\log T + 1)}{2\lambda T} + d_T$$

or equivalently

$$\mathbb{E}[X - d_T] = \mathbb{E}[Y - d_T] \leq \frac{Q(\log T + 1)}{2\lambda T}$$

where  $(x_t, y_t)_1^T$  specifies the sequence of incoming instances  $\{(x_1, y_1), \dots, (x_T, y_T)\}$  and we refer to Eq. (2) for last inequality.

According to Markov inequality, we have

$$\mathbb{P}(X - d_T \geq \varepsilon) \leq \frac{\mathbb{E}[X - d_T]}{\varepsilon} \leq \frac{Q(\log T + 1)}{2\lambda T \varepsilon}$$

$$\mathbb{P}(X - d_T < \varepsilon) \geq 1 - \frac{Q(\log T + 1)}{2\lambda T \varepsilon}$$

Choosing  $\varepsilon = \frac{Q(\log T + 1)}{2\lambda T \delta}$ , we obtain the conclusion.  $\square$

**Corollary 10.** *If  $\mathbb{E}[Z_t^2] = \mathbb{P}(Z_t = 1) = p_t \sim O(\frac{1}{t})$  then  $\mathbb{E}[\|\mathbf{w}_t - \mathbf{w}^*\|^2] \sim O(\frac{1}{t})$ .*

*Proof.* Let us define  $\delta_t = g_t - Z_t l'(\mathbf{w}_{t'}; x_{t'}, y_{t'})$ . We have the following

$$\mathbf{w}_{t+1} = \mathbf{w}_t - \eta_t \delta_t$$

$$\begin{aligned} \|\mathbf{w}_{t+1} - \mathbf{w}^*\|^2 &= \|\mathbf{w}_t - \eta_t \delta_t - \mathbf{w}^*\|^2 = \|\mathbf{w}_t - \mathbf{w}^*\|^2 + \eta_t^2 \|\delta_t\|^2 - 2\eta_t \langle \mathbf{w}_t - \mathbf{w}^*, \delta_t \rangle \\ &= \|\mathbf{w}_t - \mathbf{w}^*\|^2 + \eta_t^2 \|\delta_t\|^2 - 2\eta_t \langle \mathbf{w}_t - \mathbf{w}^*, g_t \rangle + 2\eta_t \langle \mathbf{w}_t - \mathbf{w}^*, Z_t l'(\mathbf{w}_{t'}; x_{t'}, y_{t'}) \rangle \end{aligned}$$

Taking conditional expectation w.r.t  $\mathbf{w}_t^1, x_1^{t-1}$  and note that  $t' < t$ , we gain

$$\begin{aligned} \mathbb{E}[\|\mathbf{w}_{t+1} - \mathbf{w}^*\|^2] &= \mathbb{E}[\|\mathbf{w}_t - \mathbf{w}^*\|^2] + \eta_t^2 \mathbb{E}[\|\delta_t\|^2] - 2\eta_t \langle \mathbf{w}_t - \mathbf{w}^*, \mathbb{E}[g_t] \rangle + 2\eta_t \langle \mathbf{w}_t - \mathbf{w}^*, l'(\mathbf{w}_{t'}; x_{t'}, y_{t'}) \mathbb{E}[Z_t] \rangle \\ &= \mathbb{E}[\|\mathbf{w}_t - \mathbf{w}^*\|^2] + \eta_t^2 \mathbb{E}[\|\delta_t\|^2] - 2\eta_t \langle \mathbf{w}_t - \mathbf{w}^*, f'(\mathbf{w}_t) \rangle + 2\eta_t \langle \mathbf{w}_t - \mathbf{w}^*, p_t l'(\mathbf{w}_{t'}; x_{t'}, y_{t'}) \rangle \\ &\leq \mathbb{E}[\|\mathbf{w}_t - \mathbf{w}^*\|^2] + \eta_t^2 \mathbb{E}[\|\delta_t\|^2] + 2\eta_t \langle \mathbf{w}_t - \mathbf{w}^*, p_t l'(\mathbf{w}_{t'}; x_{t'}, y_{t'}) \rangle \\ &\quad + 2\eta_t \left( f(\mathbf{w}^*) - f(\mathbf{w}_t) - \frac{\lambda}{2} \|\mathbf{w}_t - \mathbf{w}^*\|^2 \right) \end{aligned}$$

Since the function  $f(\cdot)$  is  $\lambda$ -strongly convex and  $\mathbf{w}^*$  is the optimal solution, we have

$$f(\mathbf{w}_t) - f(\mathbf{w}^*) \geq \langle f'(\mathbf{w}_t), \mathbf{w}_t - \mathbf{w}^* \rangle + \frac{\lambda}{2} \|\mathbf{w}_t - \mathbf{w}^*\|^2 \geq \frac{\lambda}{2} \|\mathbf{w}_t - \mathbf{w}^*\|^2$$

It follows that

$$\mathbb{E} \left[ \|\mathbf{w}_{t+1} - \mathbf{w}^*\|^2 \right] \leq \mathbb{E} \left[ \|\mathbf{w}_t - \mathbf{w}^*\|^2 \right] + \eta_t^2 \mathbb{E} \left[ \|\delta_t\|^2 \right] + 2\eta_t \langle \mathbf{w}_t - \mathbf{w}^*, p_t l'(\mathbf{w}_t; x_t, y_t) \rangle - 2\eta_t \lambda \|\mathbf{w}_t - \mathbf{w}^*\|^2$$

Taking expectation the above inequality, we achieve

$$\begin{aligned} \mathbb{E} \left[ \|\mathbf{w}_{t+1} - \mathbf{w}^*\|^2 \right] &\leq \mathbb{E} \left[ \|\mathbf{w}_t - \mathbf{w}^*\|^2 \right] + \eta_t^2 \mathbb{E} \left[ \|\delta_t\|^2 \right] + 2\eta_t \mathbb{E} \left[ \left\langle \mathbf{w}_t - \mathbf{w}^*, p_t l'(\mathbf{w}_t; x_t, y_t) \right\rangle \right] - 2\eta_t \lambda \mathbb{E} \left[ \|\mathbf{w}_t - \mathbf{w}^*\|^2 \right] \\ &= \frac{t-2}{t} \mathbb{E} \left[ \|\mathbf{w}_t - \mathbf{w}^*\|^2 \right] + \eta_t^2 \mathbb{E} \left[ \|\delta_t\|^2 \right] + 2\eta_t \mathbb{E} \left[ \left\langle \mathbf{w}_t - \mathbf{w}^*, p_t l'(\mathbf{w}_t; x_t, y_t) \right\rangle \right] \\ &\leq \frac{t-2}{t} \mathbb{E} \left[ \|\mathbf{w}_t - \mathbf{w}^*\|^2 \right] + \eta_t^2 \mathbb{E} \left[ \|\delta_t\|^2 \right] + 2\eta_t \mathbb{E} \left[ \|\mathbf{w}_t - \mathbf{w}^*\|^2 \right]^{1/2} \mathbb{E} \left[ p_t^2 \left\| l'(\mathbf{w}_t; x_t, y_t) \right\|^2 \right]^{1/2} \end{aligned}$$

Since  $p_t \sim O\left(\frac{1}{t}\right)$ , we have  $p_t < \frac{C}{t}$  for some  $C > 0$ . Therefore, the above inequality becomes

$$\begin{aligned} \mathbb{E} \left[ \|\mathbf{w}_{t+1} - \mathbf{w}^*\|^2 \right] &\leq \frac{t-2}{t} \mathbb{E} \left[ \|\mathbf{w}_t - \mathbf{w}^*\|^2 \right] + \eta_t^2 \mathbb{E} \left[ \|\delta_t\|^2 \right] + 2\eta_t \mathbb{E} \left[ \|\mathbf{w}_t - \mathbf{w}^*\|^2 \right]^{1/2} \frac{C}{t} \mathbb{E} \left[ \left\| l'(\mathbf{w}_t; x_t, y_t) \right\|^2 \right]^{1/2} \\ &\leq \frac{t-2}{t} \mathbb{E} \left[ \|\mathbf{w}_t - \mathbf{w}^*\|^2 \right] + \frac{Q}{\lambda^2 t^2} + \frac{\mathbb{E} \left[ \|\mathbf{w}_t - \mathbf{w}^*\|^2 \right]^{1/2} CL^{1/2}}{\lambda t^2} \end{aligned}$$

By choosing  $W_t = \frac{Q^2 \lambda^{-2} + M^{1/2} CL^{1/2}}{t}$ , we gain if  $\mathbb{E} \left[ \|\mathbf{w}_t - \mathbf{w}^*\|^2 \right] \leq W_t$ , then  $\mathbb{E} \left[ \|\mathbf{w}_{t+1} - \mathbf{w}^*\|^2 \right] \leq W_{t+1}$ .  $\square$

**Theorem 11.** Let us consider running of Algorithm 3 where  $(x_t, y_t)$  is sampled from the training set  $\mathcal{D}$  or the joint distribution  $\mathbb{P}_{X,Y}$ . Let define the gradient error as  $M_t = \frac{\Delta_t}{\eta_t} = -l'(\mathbf{w}_t; x_t, y_t)$ . We have the following

$$\mathbb{E} [f(\bar{\mathbf{w}}_T^\gamma) - f(\mathbf{w}^*)] \leq \frac{D\lambda^2 + Q \log(1/(1-\gamma))}{2\gamma T} + \frac{\beta D^{1/2}}{\gamma T} \sum_{t=(1-\gamma)T+1}^T \frac{\mathbb{E} \left[ \|M_t\|^2 \right]^{1/2}}{t^{3/2}} \quad (3)$$

*Proof.* Let us define  $\delta_t = g_t + Z_t M_t$ . We have the following

$$\mathbf{w}_{t+1} = \mathbf{w}_t - \eta_t \delta_t$$

$$\|\mathbf{w}_{t+1} - \mathbf{w}^*\|^2 = \|\mathbf{w}_t - \eta_t \delta_t - \mathbf{w}^*\|^2 = \|\mathbf{w}_t - \mathbf{w}^*\|^2 + \eta_t^2 \|\delta_t\|^2 - 2\eta_t \langle \mathbf{w}_t - \mathbf{w}^*, \delta_t \rangle$$

$$\langle \mathbf{w}_t - \mathbf{w}^*, g_t \rangle = \frac{\|\mathbf{w}_t - \mathbf{w}^*\|^2 - \|\mathbf{w}_{t+1} - \mathbf{w}^*\|^2}{2\eta_t} + \frac{\eta_t \|\delta_t\|^2}{2} - \langle \mathbf{w}_t - \mathbf{w}^*, Z_t M_t \rangle$$

Taking the conditional expectation w.r.t  $\mathbf{w}_t^1$ , we achieve

$$\langle \mathbf{w}_t - \mathbf{w}^*, \mathbb{E}[g_t] \rangle = \frac{\mathbb{E} \left[ \|\mathbf{w}_t - \mathbf{w}^*\|^2 \right] - \mathbb{E} \left[ \|\mathbf{w}_{t+1} - \mathbf{w}^*\|^2 \right]}{2\eta_t} + \frac{\eta_t \mathbb{E} \left[ \|\delta_t\|^2 \right]}{2} - \langle \mathbf{w}_t - \mathbf{w}^*, \mathbb{E}[Z_t M_t] \rangle$$

$$\langle \mathbf{w}_t - \mathbf{w}^*, f'(\mathbf{w}_t) \rangle = \frac{\mathbb{E} \left[ \|\mathbf{w}_t - \mathbf{w}^*\|^2 \right] - \mathbb{E} \left[ \|\mathbf{w}_{t+1} - \mathbf{w}^*\|^2 \right]}{2\eta_t} + \frac{\eta_t \mathbb{E} \left[ \|\delta_t\|^2 \right]}{2} - \langle \mathbf{w}_t - \mathbf{w}^*, \mathbb{E}[Z_t M_t] \rangle$$

$$f(\mathbf{w}_t) - f(\mathbf{w}^*) \leq \frac{\mathbb{E} \left[ \|\mathbf{w}_t - \mathbf{w}^*\|^2 \right] - \mathbb{E} \left[ \|\mathbf{w}_{t+1} - \mathbf{w}^*\|^2 \right]}{2\eta_t} + \frac{\eta_t \mathbb{E} \left[ \|\delta_t\|^2 \right]}{2} - \langle \mathbf{w}_t - \mathbf{w}^*, \mathbb{E}[Z_t M_t] \rangle$$

Taking expectation and summing when  $t = (1-\gamma)T+1, \dots, T$ , let  $\bar{\mathbf{w}}_T^\gamma = \frac{1}{\gamma T} \sum_{t=(1-\gamma)T+1}^T \mathbf{w}_t$  and note that  $p_t \leq P(S_t = 1) \leq \frac{\beta}{t}$ , we reach the following



$$\gamma T \mathbb{E} \left[ \frac{\sum_{t=(1-\gamma)T+1}^T f(\mathbf{w}_t)}{\gamma T} - f(\mathbf{w}^*) \right] \leq \frac{\mathbb{E} \left[ \|\mathbf{w}_{(1-\gamma)T+1} - \mathbf{w}^*\|^2 \right]}{2\eta_{(1-\gamma)T+1}} + \sum_{t=(1-\gamma)T+2}^T \mathbb{E} \left[ \|\mathbf{w}_t - \mathbf{w}^*\|^2 \right] \left( \frac{1}{2\eta_t} - \frac{1}{2\eta_{t-1}} \right) \quad (4)$$

$$\begin{aligned} &+ \sum_{t=(1-\gamma)T+1}^T \left( \frac{\eta_t \mathbb{E} \left[ \|\delta_t\|^2 \right]}{2} + E \left[ \|\mathbf{w}_t - \mathbf{w}^*\|^2 \right]^{1/2} \mathbb{E} \left[ \|M_t\|^2 \right]^{1/2} p_t \right) \\ &\leq \frac{W_T \lambda ((1-\gamma)T+1)}{2} + \frac{W_T \lambda (\gamma T - 1)}{2} + \frac{Q}{2\lambda} \sum_{t=(1-\gamma)T+1}^T \frac{1}{t} + \sum_{t=(1-\gamma)T+1}^T W_t^{1/2} \mathbb{E} \left[ \|M_t\|^2 \right]^{1/2} \frac{\beta}{t} \\ &\leq \frac{W_T \lambda T}{2} + \frac{Q}{2\lambda} \sum_{t=(1-\gamma)T+1}^T \frac{1}{t} + \beta D^{1/2} \sum_{t=(1-\gamma)T+1}^T \frac{\mathbb{E} \left[ \|M_t\|^2 \right]^{1/2}}{t^{3/2}} \\ &\leq \frac{D\lambda}{2} + \frac{Q \log(1/(1-\gamma))}{2\lambda} + \beta D^{1/2} \sum_{t=(1-\gamma)T+1}^T \frac{\mathbb{E} \left[ \|M_t\|^2 \right]^{1/2}}{t^{3/2}} \end{aligned}$$

$$\gamma T \mathbb{E} [f(\bar{\mathbf{w}}_T^\gamma) - f(\mathbf{w}^*)] \leq \frac{D\lambda}{2} + \frac{Q \log(1/(1-\gamma))}{2\lambda} + \beta D^{1/2} \sum_{t=(1-\gamma)T+1}^T \frac{\mathbb{E} \left[ \|M_t\|^2 \right]^{1/2}}{t^{3/2}}$$

To derive the last inequality, we use the facts  $\sum_{t=(1-\gamma)T+1}^T \frac{1}{t} \leq \log(1/(1-\gamma))$  and  $W_t \leq \frac{D}{t}$  for all  $t$ . Finally, we achieve

$$\mathbb{E} [f(\bar{\mathbf{w}}_T^\gamma) - f(\mathbf{w}^*)] \leq \frac{D\lambda^2 + Q \log(1/(1-\gamma))}{2\gamma T} + \frac{\beta D^{1/2}}{\gamma T} \sum_{t=(1-\gamma)T+1}^T \frac{\mathbb{E} \left[ \|M_t\|^2 \right]^{1/2}}{t^{3/2}}$$

□

**Theorem 12.** *Let us consider running of Algorithm 3 where  $(x_t, y_t)$  is sampled from the training set  $\mathcal{D}$  or the joint distribution  $\mathbb{P}_{X,Y}$ . We have the following*

$$\mathbb{E} [f(\bar{\mathbf{w}}_T^\gamma) - f(\mathbf{w}^*)] \leq \frac{D\lambda^2 + Q \log(1/(1-\gamma)) + 2\beta L D^{1/2} \log(1/(1-\gamma))}{2\gamma T}$$

*Proof.* To gain the conclusion, we use inequality in Eq. (3) and note that  $\mathbb{E} \left[ \|M_t\|^2 \right]^{1/2} = \mathbb{E} \left[ \left\| l'(\mathbf{w}_t; x_t, y_t) \right\|^2 \right]^{1/2} \leq L$ . □

**Theorem 13.** *Let  $r$  be an integer randomly picked from  $\{(1-\gamma)T+1, \dots, T\}$ . Then, with probability at least  $1-\delta$ , we have*

$$f(\mathbf{w}_r) \leq f(\mathbf{w}^*) + \frac{R}{2\gamma\delta T}$$

where we have defined  $R = D\lambda^2 + Q \log(1/(1-\gamma)) + 2\beta L D^{1/2} \log(1/(1-\gamma))$ .

*Proof.* Let us denote  $X = f(\mathbf{w}_r) - f(\mathbf{w}^*) \geq 0$  and  $Y = \frac{\sum_{t=(1-\gamma)T+1}^T f(\mathbf{w}_t)}{\gamma T} - f(\mathbf{w}^*)$ . Then, we have

$$\mathbb{E}_r [X] = \mathbb{E}_r [f(\mathbf{w}_r) - f(\mathbf{w}^*)] = \frac{\sum_{t=(1-\gamma)T+1}^T f(\mathbf{w}_t)}{\gamma T} - f(\mathbf{w}^*) = Y$$

Therefore, we gain

$$\mathbb{E}[X] = \mathbb{E}_{(x_t, y_t)_1^T} [\mathbb{E}_r[X]] = \mathbb{E}[Y] \leq \frac{R}{2\gamma T} \quad (5)$$

Note that to achieve the last inequality in Eq. (5), we refer to Eq. (4). According to Markov inequality, we have

$$\mathbb{P}(X \geq \varepsilon) \leq \frac{\mathbb{E}[X]}{\varepsilon} \leq \frac{R}{2\gamma T}$$

$$\mathbb{P}(X < \varepsilon) \geq 1 - \frac{R}{2\gamma T}$$

Choosing  $\varepsilon = \frac{R}{2\gamma\delta T}$ , we gain the conclusion.  $\square$

## 4 Exact Projection

We present in detail how to incrementally maintain the inverse matrix  $K_t^{-1}$ . We consider two cases

- $|\mathcal{I}_t| \leq B$   
We compute as follows:  
Compute  $d = K_{t-1}^{-1}k_t$   
Set  $\|\delta_t\|^2 = K(x_t, x_t) - k_t^\top d$   
Update

$$K_t^{-1} = \begin{bmatrix} & & & 0 \\ & K_{t-1}^{-1} & & \dots \\ & & & 0 \\ 0 & \dots & 0 & 0 \end{bmatrix} + \frac{1}{\|\delta_t\|^2} \begin{bmatrix} d \\ -1 \end{bmatrix} \begin{bmatrix} d^\top & -1 \end{bmatrix}$$

The computational cost to maintain  $K_t^{-1}$  when  $t$  varies from 1 to  $B$  is  $\sum_{t=1}^B O(t^2) = O(B^3)$ .

- $|\mathcal{I}_t| = B + 1$   
To update  $K_t^{-1}$  from  $K_{t-1}^{-1}$  we observe that these two matrices  $K_{t-1}$  and  $K_t$  are distinct in one row and one column. Concretely, to transform  $K_{t-1}$  to  $K_t$ , we can substitute the column  $k_p$  by  $k_t$  and do the same for the corresponding row. Therefore, we can formulate  $K_t = K_{t-1} + L$  where  $L$  is a sparse matrix of all zeros except for one column and row, which can be computed as  $L_p = k_t - k_p$ . It is apparent that  $\text{rank}(L) = 2$ . To update  $K_t^{-1}$  from  $K_{t-1}$ , we rely on Thm. 14 (cf. [1]).

We assume that the  $i$ -th column and row in  $B \times B$  matrix  $K_{t-1}$  and  $K_t$  is mapped to the element  $x_{\pi(i)}$  in  $\{x_1, x_2, \dots, x_t\}$ . We further assume the removal element  $x_p$  locates at  $m$ -th column in matrix  $K_{t-1}$ . To gain  $K_t$  from  $K_{t-1}$ , we replace  $x_p$  by  $x_t$  and hence  $\pi^{-1}(t) = \pi^{-1}(p) = m$ . It is evident that  $K_t = K_{t-1} + L$  where  $L$  is a matrix of all zeros except for  $m$ -th column and row, which is computed as  $L_m(i) = K(x_t, x_{\pi(i)}) - K(x_p, x_{\pi(i)})$  for  $i = 1, \dots, B$ . It is apparent that  $\text{rank}(L) = 2$  and it can be decomposed as  $L = L_1 + L_2$  where  $L_1, L_2$  are matrices of all zeros except for  $m$ -th column and  $m$ -th row respectively and hence  $\text{rank}(L_1) = \text{rank}(L_2) = 1$ .

To directly apply Thm. 14, we denote  $C_1 = A = K_{t-1}$ ,  $B_1 = L_1$ , and  $B_2 = L_2$ . We first compute  $C_2^{-1}$  by

$$C_2^{-1} = C_1^{-1} - g_1 C_1^{-1} B_1 C_1^{-1} \quad (6)$$

It is obvious the computational cost to compute  $C_2^{-1}$  as in Eq. (6) is  $O(B^2)$ .

We then compute  $K_t^{-1} = (A + B)^{-1} = (A + B_1 + B_2)^{-1}$  as

$$K_t^{-1} = (A + B)^{-1} = C_2^{-1} - g_2 C_2^{-1} B_2 C_2^{-1} \quad (7)$$

The computational cost of Eq. (7) is again  $O(B^2)$ .

**Theorem 14.** Let  $A$  and  $A+B$  be nonsingular matrices, and let  $B$  have rank  $r > 0$ . Let  $B = B_1 + \dots + B_r$ , where each  $B_i$  has rank 1, and each  $C_{k+1} = A + B_1 + \dots + B_k$  is nonsingular. Setting  $C_1 = A$ , then  $C_{k+1}^{-1} = C_k^{-1} - g_k C_k^{-1} B_k C_k^{-1}$  where  $g_k = \frac{1}{1 + \text{trace}(C_k^{-1} B_k)}$ . In particular,  $(A + B)^{-1} = C_r^{-1} - g_r C_r^{-1} B_r C_r^{-1}$ .

## References

- [1] K. S. Miller. On the Inverse of the Sum of Matrices. *Mathematics Magazine*, 54(2):67–72, 1981.
